# Supplementary material
Source: Springer Nature journal article supplement (https://www.springermedizin.de/resource/supplementary/12987_2007_283_MOESM2_ESM.pdf/9611710)

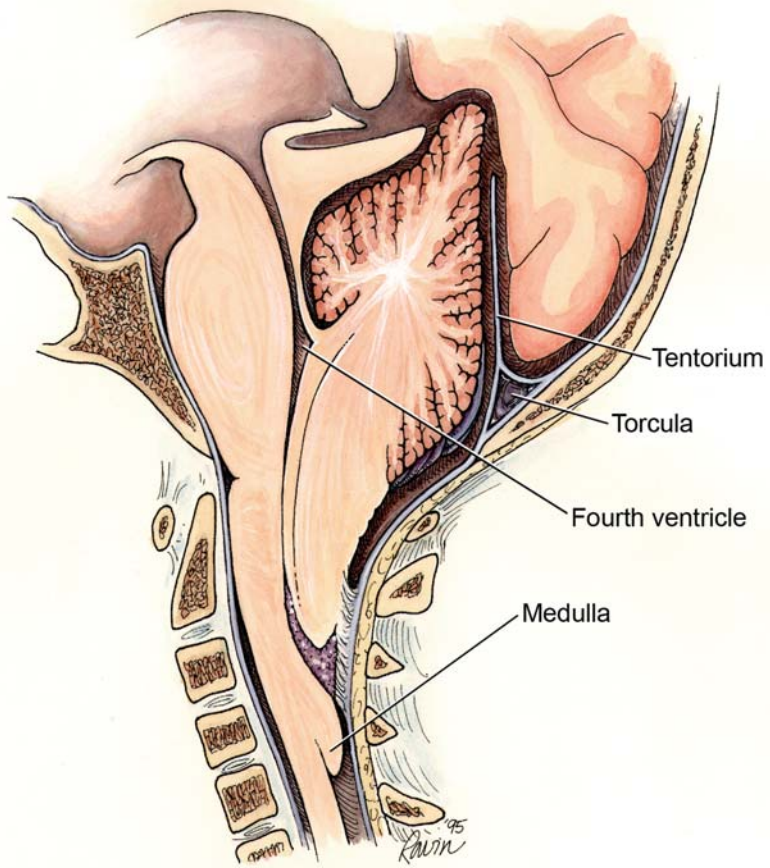

Tentorium

Torcula

Fourth ventricle

Medulla

KAVIN 95

Supplement: MOESM2 [file 9611710]
